# Supplementary material for: Design and application of a smart nanodevice by combining cationic drug delivery and hyperthermia for cancer apoptosis
Source: Royal Society of Chemistry journal article supplement (doi:10.1039/c5tb02011e), 2015-12-21
Supplement: c5tb02011e1.pdf [file c5tb02011e1.pdf]

## Supporting Information

# **Design and Application of a Smart Nanodevice by Combining Cationic Drug Delivery and Hyperthermia for Cancer Apoptosis**

**Arathyram Ramachandra Kurup Sasikala<sup>1</sup>, Afeesh Rajan Unnithan<sup>1,2\*</sup>, Chan Hee  
Park<sup>1,2\*</sup>, Cheol Sang Kim<sup>1,2\*</sup>**

*<sup>1</sup> Department of Bionanosystem Engineering Graduate School, Chonbuk National University,  
Jeonju, Republic of Korea*

*<sup>2</sup> Division of Mechanical Design Engineering, Chonbuk National University, Jeonju, Republic of  
Korea*

## Magnetic property measurements

The magnetic properties of MFNPs and MSMFNPs were investigated by measuring magnetization as a function of the applied field at 300 K. Both nanoparticles exhibited superparamagnetic behavior with no coercivity or remanence (Figure S1). MFNPs yielded a high saturation magnetization value (93.87 emu/g), while the MSMFNPs exhibited a relatively low magnetization value (14.9 emu/g). The reduction in magnetization of MSMFNPs can be explained by the effect of the nonmagnetic silica shells<sup>1</sup>. The results indicate that both MFNPs and MSMFNPs have the potential for generating heat under an alternating magnetic field.

## AMF-Induced Heat Generation Properties and calculation of SAR

The magnetic field-dependent heating ability of MSMFNPs was measured at various concentrations and found that 8 mg/ml of MSMFNPs was exhibited a hyperthermic temperature of ~ 42 °C upon applying an AMF in 1200 sec with a comparable SAR value (Figure S2).

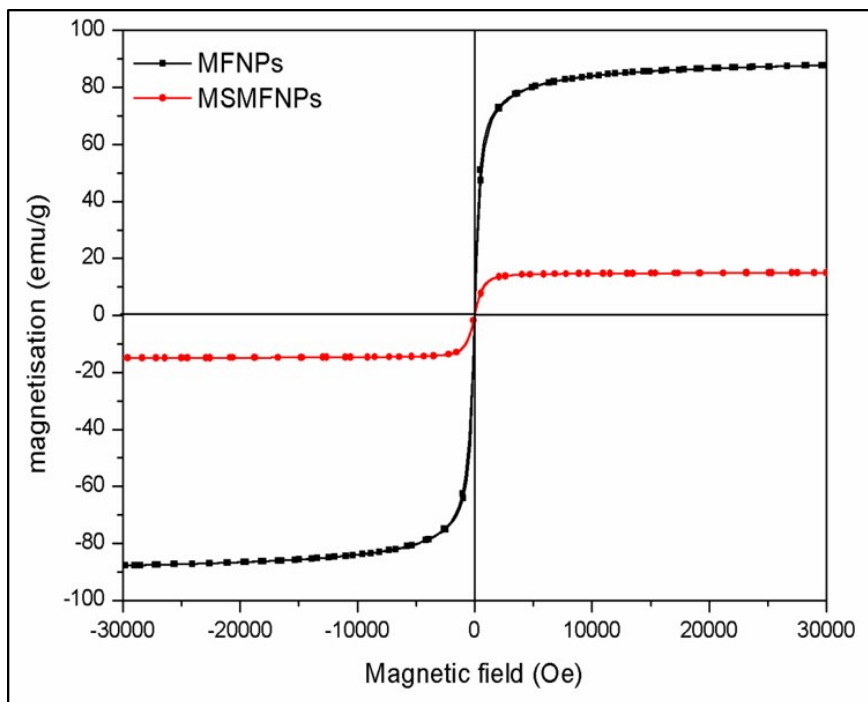

**Figure S1.** Field-dependent magnetization of MFNPs and MSMFNPs

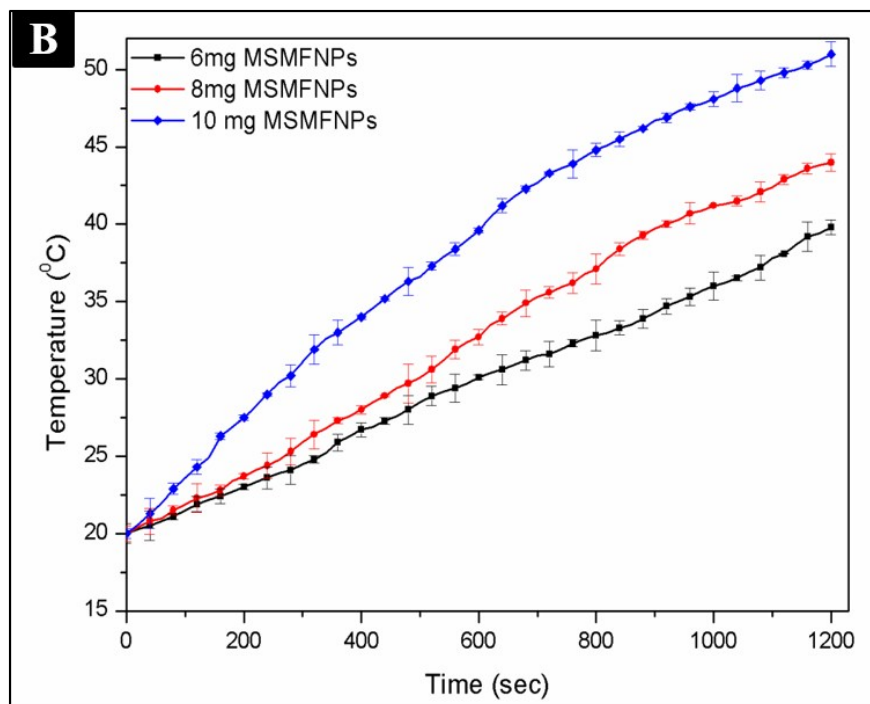

**Figure S2.** AMF-induced heating ability of MSMFNPs at varying concentrations

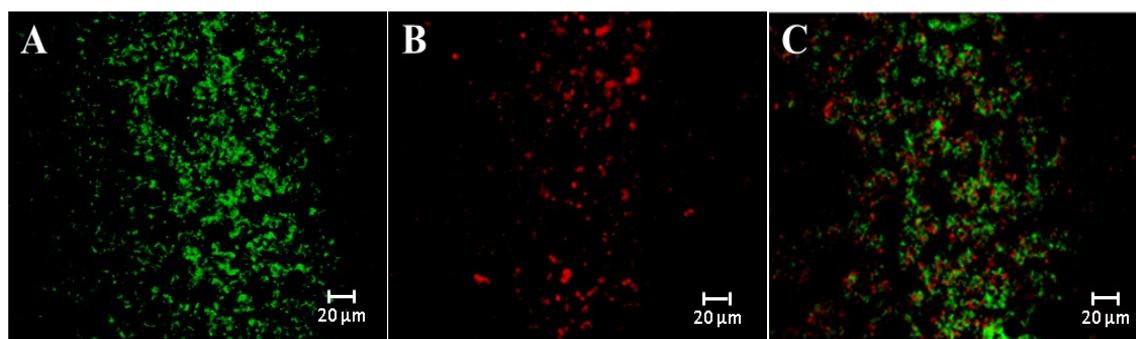

**Figure S3.** Live/dead assay showing the anticancer effect of DOX alone

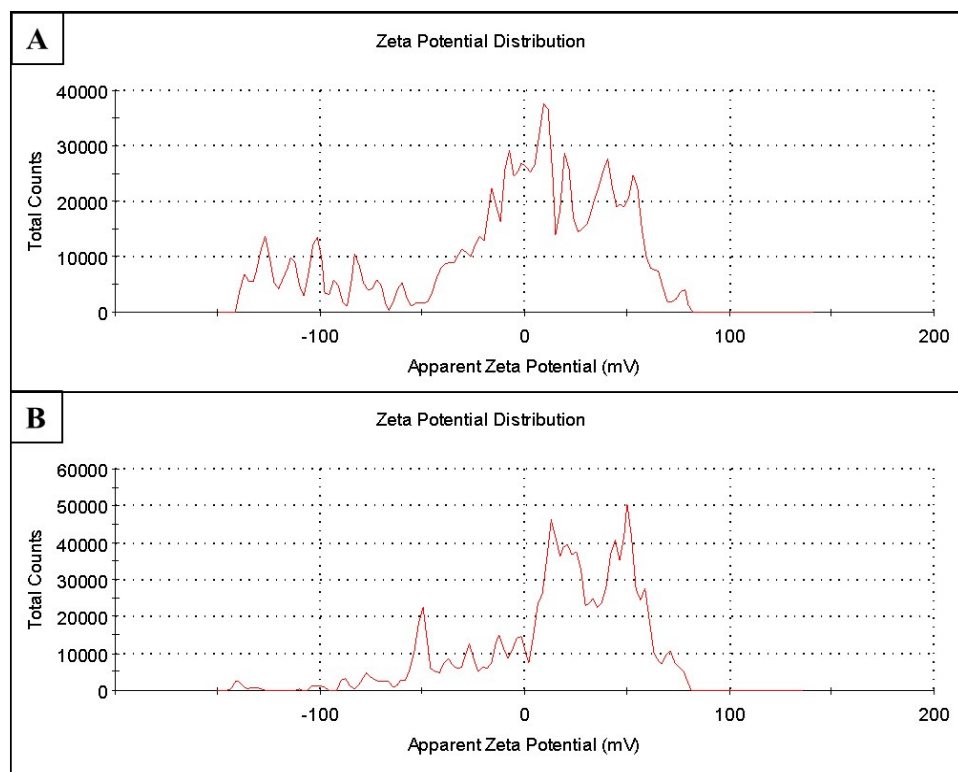

**Figure S4.** Zeta potential spectra of (A) MSMFNPs-CDA (-8.10 mV) and (B) MSMFNPs-CDA-DOX (17.1mV) respectively

## Reference

1. Y. F. Zhu, T. Ikoma, N. Hanagata and S. Kaskel, *Small*, 2010, **6**, 471-478.
